# Supplementary material for: Low Exposure to Direct Oral Anticoagulants Is Associated with Ischemic Stroke and Its Severity
Source: PubMed Central journal article supplement — J Stroke. 2022 Jan 31;24(1):88–97. doi: 10.5853/jos.2020.04952 (PMC8829480; doi:10.5853/jos.2020.04952), 2022-01-31
Supplement: jos-2020-04952-suppl1.pdf [file jos-2020-04952-suppl1.pdf]

**Supplementary Table 1.** Demographic findings, cardiovascular risk factors, and DOAC-specific findings of all included patients (n=211)

| Variable                                                                    | AUC cohort (n=211, 100%)             | Apixaban (n=79, 100%)               | Edoxaban (n=20, 100%)              | Rivaroxaban (n=88, 100%)            | Dabigatran (n=24, 100%)             |
|-----------------------------------------------------------------------------|--------------------------------------|-------------------------------------|------------------------------------|-------------------------------------|-------------------------------------|
| Female sex                                                                  | 107 (50.7)                           | 46 (58.2)                           | 9 (45.0)                           | 40 (45.5)                           | 12 (50.0)                           |
| Age (yr)                                                                    | 80 (75–86)                           | 82 (77–88)                          | 78 (75–81)                         | 79 (73–86)                          | 78 (75–83)                          |
| Body weight (kg)                                                            | 75 (65–85)<br>201 (95.3)             | 74 (65–83)<br>75 (94.9)             | 78 (70–85)<br>20 (100)             | 75 (65–85)<br>83 (94.3)             | 81 (64–92)<br>23 (95.8)             |
| Ischemic stroke                                                             | 157 (74.4)                           | 59 (74.7)                           | 17 (85.0)                          | 61 (69.3)                           | 20 (83.3)                           |
| TIA                                                                         | 54 (25.6)                            | 20 (25.3)                           | 3 (15.0)                           | 27 (30.7)                           | 4 (16.7)                            |
| Large vessel occlusion (ICA, MCA [1–3], PCA, ACA, BA)                       | 71 (33.6)                            | 27 (34.2)                           | 6 (30.0)                           | 32 (36.4)                           | 6 (25.0)                            |
| Large-artery atherosclerosis*                                               | 21 (13.4)                            | 5 (8.5)                             | 3 (17.6)                           | 10 (16.4)                           | 3 (15.0)                            |
| Cardioembolism*                                                             | 124 (79.0)                           | 53 (89.8)                           | 12 (70.6)                          | 46 (75.4)                           | 13 (65.0)                           |
| Small-vessel occlusion*                                                     | 2 (1.3)                              | 0 (0)                               | 1 (5.9)                            | 1 (1.6)                             | 0 (0)                               |
| Stroke of other determined etiology*                                        | 0 (0)                                | 0 (0)                               | 0 (0)                              | 0 (0)                               | 0 (0)                               |
| Stroke of undetermined etiology*                                            | 10 (6.4)                             | 1 (1.7)                             | 1 (5.9)                            | 4 (6.6)                             | 4 (20.0)                            |
| Time of ischemic stroke/TIA (00:00–7:59) <sup>†</sup>                       | 33 (18.4)                            | 18 (26.9)                           | 3 (18.8)                           | 8 (10.3)                            | 4 (22.2)                            |
| Time of ischemic stroke/TIA (8:00–15:59) <sup>†</sup>                       | 94 (52.5)                            | 30 (44.8)                           | 6 (37.5)                           | 48 (61.5)                           | 10 (55.6)                           |
| Time of ischemic stroke/TIA (16:00–23:59) <sup>†</sup>                      | 52 (29.1)                            | 19 (28.4)                           | 7 (43.8)                           | 22 (28.2)                           | 4 (22.2)                            |
| Functional impairment                                                       |                                      |                                     |                                    |                                     |                                     |
| Admission NIHSS of patients with ischemic stroke                            | 6 (3–16)                             | 7 (4–18)                            | 4 (2–15)                           | 9 (3–15)                            | 4 (1–11)                            |
| Premorbid modified Rankin Scale                                             | 1 (0–3)                              | 2 (0–3)                             | 1 (0–2)                            | 1 (0–3)                             | 1 (0–3)                             |
| Modified Rankin Scale at 3 months                                           | 3 (1–5)<br>199 (94.3)                | 3 (1–6)<br>74 (93.7)                | 1 (0–4)<br>19 (95.0)               | 2 (0–5)<br>83 (94.3)                | 3 (1–3)<br>23 (95.8)                |
| Comorbidities                                                               |                                      |                                     |                                    |                                     |                                     |
| Arterial hypertension                                                       | 190 (90.0)                           | 70 (88.6)                           | 19 (95.0)                          | 78 (88.6)                           | 23 (95.8)                           |
| Diabetes                                                                    | 68 (32.2)                            | 28 (35.4)                           | 2 (10.0)                           | 24 (27.3)                           | 14 (58.3)                           |
| Hypercholesterolemia                                                        | 119 (56.4)                           | 39 (49.4)                           | 15 (75.0)                          | 51 (58.0)                           | 14 (58.3)                           |
| Previous stroke or TIA                                                      | 74 (35.1)                            | 33 (41.8)                           | 6 (30.0)                           | 29 (33.0)                           | 6 (25.0)                            |
| Congestive heart failure                                                    | 40 (19.0)                            | 17 (21.5)                           | 4 (20.0)                           | 14 (15.9)                           | 5 (20.8)                            |
| Vascular disease                                                            | 114 (54.0)                           | 39 (49.4)                           | 9 (45.0)                           | 49 (55.7)                           | 17 (70.8)                           |
| Atrial fibrillation                                                         | 192 (91.0)                           | 73 (92.4)                           | 17 (85.0)                          | 80 (90.9)                           | 22 (91.7)                           |
| Premorbid CHA <sub>2</sub> DS <sub>2</sub> -VASc score                      | 5 (4–6)                              | 5 (4–7)                             | 5 (4–6)                            | 5 (4–6)                             | 6 (5–7)                             |
| Creatinine at admission (mg/dL)                                             | 0.92 (0.77–1.14)                     | 0.93 (0.75–1.23)                    | 0.93 (0.76–1.04)                   | 0.95 (0.77–1.14)                    | 0.85 (0.77–1.12)                    |
| eGFR (mL/min) <sup>‡</sup>                                                  | 62.0 (47.6–82.2)<br>167 (79.1)       | 56.6 (43.2–78.9)<br>61 (77.2)       | 67.6 (52.2–83.4)<br>16 (80.0)      | 65.4 (48.2–82.6)<br>73 (83.0)       | 63.7 (55.2–87.5)<br>17 (70.8)       |
| Pharmacotherapy                                                             |                                      |                                     |                                    |                                     |                                     |
| Additional antiplatelet therapy                                             | 19 (9.0)                             | 6 (7.6)                             | 1 (5.0)                            | 9 (10.2)                            | 3 (12.5)                            |
| Time between last DOAC intake and admission (min)                           | 582 (282–891)                        | 542 (298–826)                       | 658 (432–1293)                     | 610 (275–955)                       | 420 (205–795)                       |
| Time between DOAC intake and event (min) <sup>†</sup>                       | 480 (210–690)<br>179 (84.8)          | 450 (280–630)<br>67 (84.8)          | 515 (378–1043)<br>16 (80.0)        | 450 (150–848)<br>78 (88.6)          | 495 (229–668)<br>18 (75.0)          |
| DOAC concentration <sup>§</sup> at admission (ng/mL)                        | 110.0 (42.2–220.0)                   | 123.0 (59.6–210.0)                  | 38.0 (11.9–103.7)                  | 127.5 (26.4–291.5)                  | 83.8 (47.6–200.8)                   |
| Power transformed normalized AUC                                            | 0.4399 (0.2889–0.5793)               | 0.3949 (0.2916–0.4881)              | 0.4387 (0.3036–0.4903)             | 0.5610 (0.2722–0.6730)              | 0.4284 (0.2447–0.5355)              |
| Power transformed normalized DOAC concentration at event onset <sup>†</sup> | 0.5577 (0.2573–0.8037)<br>179 (84.8) | 0.5810 (0.4604–0.7924)<br>67 (84.8) | 0.3204 (0.823–0.6051)<br>16 (80.0) | 0.5883 (0.1791–0.8610)<br>78 (88.6) | 0.3927 (0.2394–0.5747)<br>18 (75.0) |
| Non-adherence                                                               | 19 (9.0)                             | 4 (5.1)                             | 2 (10.0)                           | 12 (13.6)                           | 1 (4.2)                             |
| Prescription quality                                                        |                                      |                                     |                                    |                                     |                                     |
| DOAC adherence to SmPCs: underdosed                                         | 51 (24.2)                            | 25 (31.6)                           | 2 (10.0)                           | 23 (26.1)                           | 1 (4.2)                             |
| DOAC adherence to SmPCs: correctly dosed                                    | 153 (72.5)                           | 53 (67.1)                           | 18 (90.0)                          | 60 (68.2)                           | 22 (91.7)                           |
| DOAC adherence to SmPCs: overdosed                                          | 7 (3.3)                              | 1 (1.3)                             | 0 (0)                              | 5 (5.7)                             | 1 (4.2)                             |

Values are presented as number (%) or median (interquartile range).

DOAC, direct oral anticoagulant; AUC, area under the curve; TIA, transient ischemic attack; ICA, internal carotid artery; MCA (1–3), middle cerebral artery (segments 1–3); PCA, posterior cerebral artery; ACA, anterior cerebral artery; BA, basilar artery; NIHSS, National Institutes of Health Stroke Scale; eGFR, estimated glomerular filtration rate; SmPC, recommended doses from summaries of product characteristic.

\*According to Trial of Org 10172 in Acute Stroke Treatment (TOAST) criteria in ischemic stroke patients only; <sup>†</sup>Concentration subgroup only (total n=179; 84.8%); <sup>‡</sup>Estimated glomerular filtration rate according to Cockcroft–Gault formula; <sup>§</sup>Ultraprecision liquid chromatography–tandem mass spectrometry.
