# Supplementary material for: Low Exposure to Direct Oral Anticoagulants Is Associated with Ischemic Stroke and Its Severity
Source: PubMed Central journal article supplement — J Stroke. 2022 Jan 31;24(1):88–97. doi: 10.5853/jos.2020.04952 (PMC8829480; doi:10.5853/jos.2020.04952), 2022-01-31
Supplement: jos-2020-04952-suppl2.pdf [file jos-2020-04952-suppl2.pdf]

**Supplementary Table 2.** Differences between low and high DOAC exposure (n=211)

| Variable                                               | Low DOAC exposure (AUC <0.5)<br>(n=133, 63.0%) | High DOAC exposure (AUC ≥0.5)<br>(n=78, 37.0%) | Descriptive P       |
|--------------------------------------------------------|------------------------------------------------|------------------------------------------------|---------------------|
| Female sex                                             | 67 (50.4)                                      | 40 (51.3)                                      | 0.899 <sup>‡</sup>  |
| Age (yr)                                               | 80 (74–86)                                     | 80 (76–86)                                     | 0.452 <sup>§</sup>  |
| Body weight (kg)                                       | 75 (65–85)<br>124 (93.2)                       | 75 (65–84)<br>77 (98.7)                        | 0.977 <sup>§</sup>  |
| Ischemic stroke                                        | 107 (80.5)                                     | 50 (64.1)                                      | 0.014 <sup>‡</sup>  |
| TIA                                                    | 26 (19.5)                                      | 28 (35.9)                                      |                     |
| Large vessel occlusion (ICA, MCA [1–3], PCA, ACA, BA)  | 51 (38.3)                                      | 20 (25.6)                                      | 0.059 <sup>‡</sup>  |
| Time of ischemic stroke/TIA (00:00–7:59)*              | 24 (18.0)                                      | 21 (26.9)                                      | 0.129 <sup>‡</sup>  |
| Time of ischemic stroke/TIA (8:00–15:59)*              | 71 (53.4)                                      | 35 (44.9)                                      | 0.233 <sup>‡</sup>  |
| Time of ischemic stroke/TIA (16:00–23:59)*             | 38 (28.6)                                      | 22 (28.2)                                      | 0.955 <sup>‡</sup>  |
| <b>Functional impairment</b>                           |                                                |                                                |                     |
| Admission NIHSS of patients with ischemic stroke       | 7 (3–18)                                       | 5 (2–11)                                       | 0.020 <sup>§</sup>  |
| Premorbid modified Rankin Scale                        | 2 (0–3)                                        | 1 (0–3)                                        | 0.353 <sup>§</sup>  |
| Modified Rankin Scale at 3 months                      | 3 (1–5)<br>124 (93.2)                          | 2 (0–4)<br>75 (96.2)                           | 0.016 <sup>§</sup>  |
| <b>Comorbidities</b>                                   |                                                |                                                |                     |
| Arterial hypertension                                  | 120 (90.2)                                     | 70 (89.7)                                      | 0.910 <sup>‡</sup>  |
| Diabetes                                               | 45 (33.8)                                      | 23 (29.5)                                      | 0.514 <sup>‡</sup>  |
| Hypercholesterolemia                                   | 74 (55.6)                                      | 45 (57.7)                                      | 0.772 <sup>‡</sup>  |
| Previous stroke or TIA                                 | 45 (33.8)                                      | 29 (37.2)                                      | 0.623 <sup>‡</sup>  |
| Congestive heart failure                               | 26 (19.5)                                      | 14 (17.9)                                      | 0.775 <sup>‡</sup>  |
| Vascular disease                                       | 70 (52.6)                                      | 44 (56.4)                                      | 0.595 <sup>‡</sup>  |
| Atrial fibrillation                                    | 120 (90.2)                                     | 72 (92.3)                                      | 0.610 <sup>‡</sup>  |
| Premorbid CHA <sub>2</sub> DS <sub>2</sub> -VASc score | 5 (4–6)                                        | 5 (4–6)                                        | 0.401 <sup>§</sup>  |
| Creatinine at admission (mg/dL)                        | 0.89 (0.75–1.13)                               | 0.98 (0.78–1.16)                               | 0.658 <sup>§</sup>  |
| eGFR (mL/min) <sup>†</sup>                             | 65.08 (50.3–85.0)<br>107 (80.5)                | 56.27 (43.0–77.0)<br>60 (76.9)                 | 0.081 <sup>§</sup>  |
| <b>Pharmacotherapy</b>                                 |                                                |                                                |                     |
| Apixaban                                               | 62 (46.6)                                      | 17 (21.8)                                      | <0.001 <sup>‡</sup> |
| Edoxaban                                               | 16 (12.0)                                      | 4 (5.1)                                        | 0.099 <sup>‡</sup>  |
| Rivaroxaban                                            | 38 (28.6)                                      | 50 (64.1)                                      | <0.001 <sup>‡</sup> |
| Dabigatran                                             | 17 (12.8)                                      | 7 (9.0)                                        | 0.400 <sup>‡</sup>  |
| Additional antiplatelet therapy                        | 12 (9.0)                                       | 7 (9.0)                                        | 0.832 <sup>‡</sup>  |
| Time between last DOAC intake and admission (min)      | 635 (294–942)                                  | 523 (280–788)                                  | 0.264 <sup>§</sup>  |
| Time between DOAC intake and event (min)*              | 505 (18–725)<br>118 (88.7)                     | 450 (235–645)<br>61 (78.2)                     | 0.138 <sup>§</sup>  |
| <b>Prescription quality</b>                            |                                                |                                                |                     |
| DOAC adherence to SmPCs: underdosed                    | 38 (28.6)                                      | 13 (16.7)                                      | 0.051 <sup>‡</sup>  |
| DOAC adherence to SmPCs: correctly dosed               | 93 (69.9)                                      | 60 (76.9)                                      | 0.272 <sup>‡</sup>  |
| DOAC adherence to SmPCs: overdosed                     | 2 (1.5)                                        | 5 (6.4)                                        | 0.055 <sup>‡</sup>  |

Values are presented as number (%) or median (interquartile range).

DOAC, direct oral anticoagulant; AUC, area under the curve; TIA, transient ischemic attack; ICA, internal carotid artery; MCA (1–3), middle cerebral artery (segments 1–3); PCA, posterior cerebral artery; ACA, anterior cerebral artery; BA, basilar artery; NIHSS, National Institutes of Health Stroke Scale; eGFR, estimated glomerular filtration rate; SmPC, recommended doses from summaries of product characteristic.

\*Concentration subgroup only (total n=179/211; 84.8%); <sup>†</sup>eGFR according to Cockcroft-Gault formula; <sup>‡</sup>Chi-square; <sup>§</sup>t-test.
