# Supplementary material for: Low Exposure to Direct Oral Anticoagulants Is Associated with Ischemic Stroke and Its Severity
Source: PubMed Central journal article supplement — J Stroke. 2022 Jan 31;24(1):88–97. doi: 10.5853/jos.2020.04952 (PMC8829480; doi:10.5853/jos.2020.04952), 2022-01-31
Supplement: jos-2020-04952-suppl3.pdf [file jos-2020-04952-suppl3.pdf]

**Supplementary Table 3.** Multivariate logistic regression between high and low DOAC exposure (n=211)

| Variable                            | High vs. low DOAC exposure |             |       |
|-------------------------------------|----------------------------|-------------|-------|
|                                     | OR                         | 95% CI      | P     |
| Creatinine at admission (mg/dL)     | 0.905                      | 0.398–2.074 | 0.809 |
| Age                                 | 0.985                      | 0.949–1.020 | 0.410 |
| Female sex                          | 0.936                      | 0.499–1.759 | 0.836 |
| DOAC adherence to SmPCs: overdosed  | 0.327                      | 0.046–1.586 | 0.193 |
| DOAC adherence to SmPCs: underdosed | 2.125                      | 1.039–4.560 | 0.044 |

DOAC, direct oral anticoagulant; OR, odds ratio; CI, confidence interval; SmPC, recommended doses from summaries of product characteristic.

**Supplementary Table 4.** Multivariate logistic regression between patients with and without large vessel occlusions of all included patients and of patients with modeled DOAC concentration at the event

| Variable                                     | Large vessel occlusion vs. no large vessel occlusion*      |             |       |                                                                                            |             |       |
|----------------------------------------------|------------------------------------------------------------|-------------|-------|--------------------------------------------------------------------------------------------|-------------|-------|
|                                              | All included ischemic stroke patients (n=157) <sup>†</sup> |             |       | Ischemic stroke patients with modeled DOAC concentration at the event (n=131) <sup>‡</sup> |             |       |
|                                              | OR                                                         | 95 % CI     | P     | OR                                                                                         | 95 % CI     | P     |
| Low DOAC exposure <sup>§</sup>               | 1.360                                                      | 0.660–2.803 | 0.404 | -                                                                                          | -           | -     |
| Low DOAC concentration at event <sup>§</sup> | -                                                          | -           | -     | 0.619                                                                                      | 0.287–1.335 | 0.222 |
| Female sex                                   | 0.713                                                      | 0.348–1.459 | 0.354 | 0.763                                                                                      | 0.350–1.663 | 0.496 |
| Age                                          | 0.982                                                      | 0.945–1.021 | 0.364 | 0.965                                                                                      | 0.923–1.009 | 0.119 |
| Hypertension                                 | 0.496                                                      | 0.158–1.557 | 0.230 | 0.779                                                                                      | 0.233–2.600 | 0.685 |
| Diabetes mellitus                            | 0.827                                                      | 0.369–1.851 | 0.644 | 1.174                                                                                      | 0.467–2.948 | 0.733 |
| Hypercholesterolemia                         | 0.875                                                      | 0.428–1.791 | 0.716 | 0.768                                                                                      | 0.349–1.689 | 0.511 |
| Previous stroke/TIA                          | 0.560                                                      | 0.265–1.182 | 0.128 | 0.568                                                                                      | 0.256–1.261 | 0.165 |
| Congestive heart failure                     | 2.001                                                      | 0.851–4.709 | 0.112 | 2.468                                                                                      | 0.912–6.683 | 0.075 |
| Vascular disease                             | 0.767                                                      | 0.366–1.610 | 0.484 | 0.693                                                                                      | 0.305–1.574 | 0.381 |
| Atrial fibrillation                          | 1.216                                                      | 0.374–3.957 | 0.745 | 1.103                                                                                      | 0.290–4.197 | 0.885 |

DOAC, direct oral anticoagulant; OR, odds ratio; CI, confidence interval; TIA, transient ischemic attack.

\*Internal carotid artery, middle cerebral artery (segments 1–3), posterior cerebral artery, anterior cerebral artery, or basilar artery; <sup>†</sup>No large vessel occlusion (n=87), large vessel occlusion (n=70); <sup>‡</sup>No large vessel occlusion (n=62), large vessel occlusion (n=69); <sup>§</sup>Derived from normalized ratios with reference populations.
