# Supplementary material for: Low Exposure to Direct Oral Anticoagulants Is Associated with Ischemic Stroke and Its Severity
Source: PubMed Central journal article supplement — J Stroke. 2022 Jan 31;24(1):88–97. doi: 10.5853/jos.2020.04952 (PMC8829480; doi:10.5853/jos.2020.04952), 2022-01-31
Supplement: jos-2020-04952-suppl6.pdf [file jos-2020-04952-suppl6.pdf]

**Supplementary Table 6.** Differences between favorable and unfavorable 3 months outcome in ischemic stroke patients (n=149)

| Variable                                               | 3-month mRS 0–2<br>(n=57, 38.3%) | 3-month mRS 3–6<br>(n=92, 61.7%) | Descriptive P       |
|--------------------------------------------------------|----------------------------------|----------------------------------|---------------------|
| Female sex                                             | 24 (42.1)                        | 53 (57.6)                        | 0.066 <sup>†</sup>  |
| Age (yr)                                               | 76 (72–81)                       | 82 (76–87)                       | <0.001 <sup>§</sup> |
| Body weight (kg)                                       | 80 (69–90)<br>57 (100)           | 74 (65–82)<br>87 (94.6)          | 0.002 <sup>§</sup>  |
| Large vessel occlusion (ICA, MCA [1–3], PCA, ACA, BA)  | 24 (42.1)                        | 45 (48.9)                        | 0.418 <sup>†</sup>  |
| Recanalisation therapy                                 | 22 (38.6)                        | 34 (37.0)                        | 0.841 <sup>†</sup>  |
| Time of ischemic stroke (00:00–07:59)*                 | 8 (18.6)                         | 13 (15.9)                        | 0.696 <sup>§</sup>  |
| Time of ischemic stroke (8:00–15:59)*                  | 22 (51.2)                        | 47 (57.3)                        | 0.511 <sup>§</sup>  |
| Time of ischemic stroke (16:00–23:59)*                 | 13 (30.2)                        | 22 (26.8)                        | 0.687 <sup>§</sup>  |
| Functional impairment                                  |                                  |                                  |                     |
| Admission NIHSS                                        | 3 (1–7)                          | 11 (5–19)                        | <0.001 <sup>§</sup> |
| Premorbid mRS                                          | 1 (0–1)                          | 3 (1–3)                          | <0.001 <sup>§</sup> |
| Comorbidities                                          |                                  |                                  |                     |
| Arterial hypertension                                  | 53 (93.0)                        | 81 (88.0)                        | 0.330 <sup>†</sup>  |
| Diabetes                                               | 13 (22.8)                        | 31 (33.7)                        | 0.157 <sup>†</sup>  |
| Hypercholesterolemia                                   | 33 (57.9)                        | 46 (50.0)                        | 0.348 <sup>†</sup>  |
| Previous stroke or TIA                                 | 15 (26.3)                        | 33 (35.9)                        | 0.225 <sup>†</sup>  |
| Congestive heart failure                               | 13 (22.8)                        | 19 (20.7)                        | 0.756 <sup>†</sup>  |
| Vascular disease                                       | 29 (50.9)                        | 50 (54.3)                        | 0.680 <sup>†</sup>  |
| Atrial fibrillation                                    | 52 (91.2)                        | 85 (92.4)                        | 0.800 <sup>†</sup>  |
| Premorbid CHA <sub>2</sub> DS <sub>2</sub> -VAsC score | 4 (3–6)                          | 5 (4–6)                          | 0.009 <sup>§</sup>  |
| Creatinine at admission (mg/dL)                        | 0.88 (0.74–1.10)                 | 0.94 (0.73–1.15)                 | 0.537 <sup>§</sup>  |
| eGFR (mL/min) <sup>‡</sup>                             | 67.56 (56.4–82.2)<br>43 (75.4)   | 59.24 (41.6–82.1)<br>76 (82.6)   | 0.018 <sup>§</sup>  |
| Pharmacotherapy                                        |                                  |                                  |                     |
| Time between last DOAC intake and admission (min)      | 496 (249–869)                    | 650 (409–952)                    | 0.162 <sup>§</sup>  |
| Time between DOAC intake and event (min)*              | 420 (180–720)                    | 480 (236–698)                    | 0.035 <sup>§</sup>  |
| Low DOAC exposure                                      | 36 (63.2)                        | 65 (70.7)                        | 0.341 <sup>†</sup>  |
| Low DOAC concentration at event*                       | 22/43 (51.2)                     | 42/82 (51.2)                     | 0.995 <sup>†</sup>  |
| Non-adherence                                          | 4 (7.0)                          | 12 (13.0)                        | 0.031 <sup>†</sup>  |
| Prescription quality                                   |                                  |                                  |                     |
| DOAC adherence to SmPCs: underdosed                    | 13 (22.8)                        | 27 (29.3)                        | 0.381 <sup>†</sup>  |
| DOAC adherence to SmPCs: correctly dosed               | 43 (75.4)                        | 61 (66.3)                        | 0.238 <sup>†</sup>  |
| DOAC adherence to SmPCs: overdosed                     | 1 (1.8)                          | 4 (4.3)                          | 0.393 <sup>†</sup>  |

Values are presented as number (%) or median (interquartile range).

mRS, modified Rankin Scale; ICA, internal carotid artery; MCA (1–3), middle cerebral artery (segments 1–3); PCA, posterior cerebral artery; ACA, anterior cerebral artery; BA, basilar artery; NIHSS, National Institutes of Health Stroke Scale; TIA, transient ischemic attack; eGFR, estimated glomerular filtration rate; DOAC, direct oral anticoagulant; SmPC, recommended doses from summaries of product characteristic.

\*Concentration subgroup only (n=125); <sup>‡</sup>eGFR according to Cockcroft–Gault formula; <sup>†</sup>Chi-square; <sup>§</sup>t-test.
