# Supplementary material for: Low Exposure to Direct Oral Anticoagulants Is Associated with Ischemic Stroke and Its Severity
Source: PubMed Central journal article supplement — J Stroke. 2022 Jan 31;24(1):88–97. doi: 10.5853/jos.2020.04952 (PMC8829480; doi:10.5853/jos.2020.04952), 2022-01-31
Supplement: jos-2020-04952-suppl9.pdf [file jos-2020-04952-suppl9.pdf]

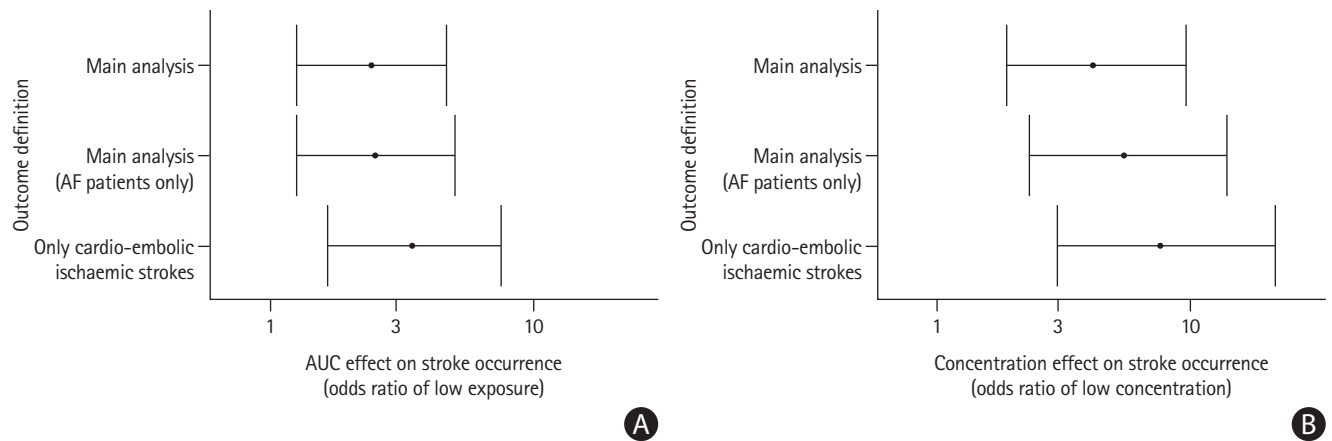

**Supplementary Figure 2.** Forest plot of effect estimates (expressed as odds ratios) of either low direct oral anticoagulant (DOAC) plasma exposure (A) or low DOAC plasma concentration at the time of the event (B) on the risk of ischemic stroke. Different outcome definitions are plotted on the discrete y-axis with the results from the main analysis, a restricted sample including only patients with atrial fibrillation (AF), and a sample including only cardioembolic ischemic strokes. Whiskers around the point estimates visualize 95% confidence intervals. AUC, area under the curve.

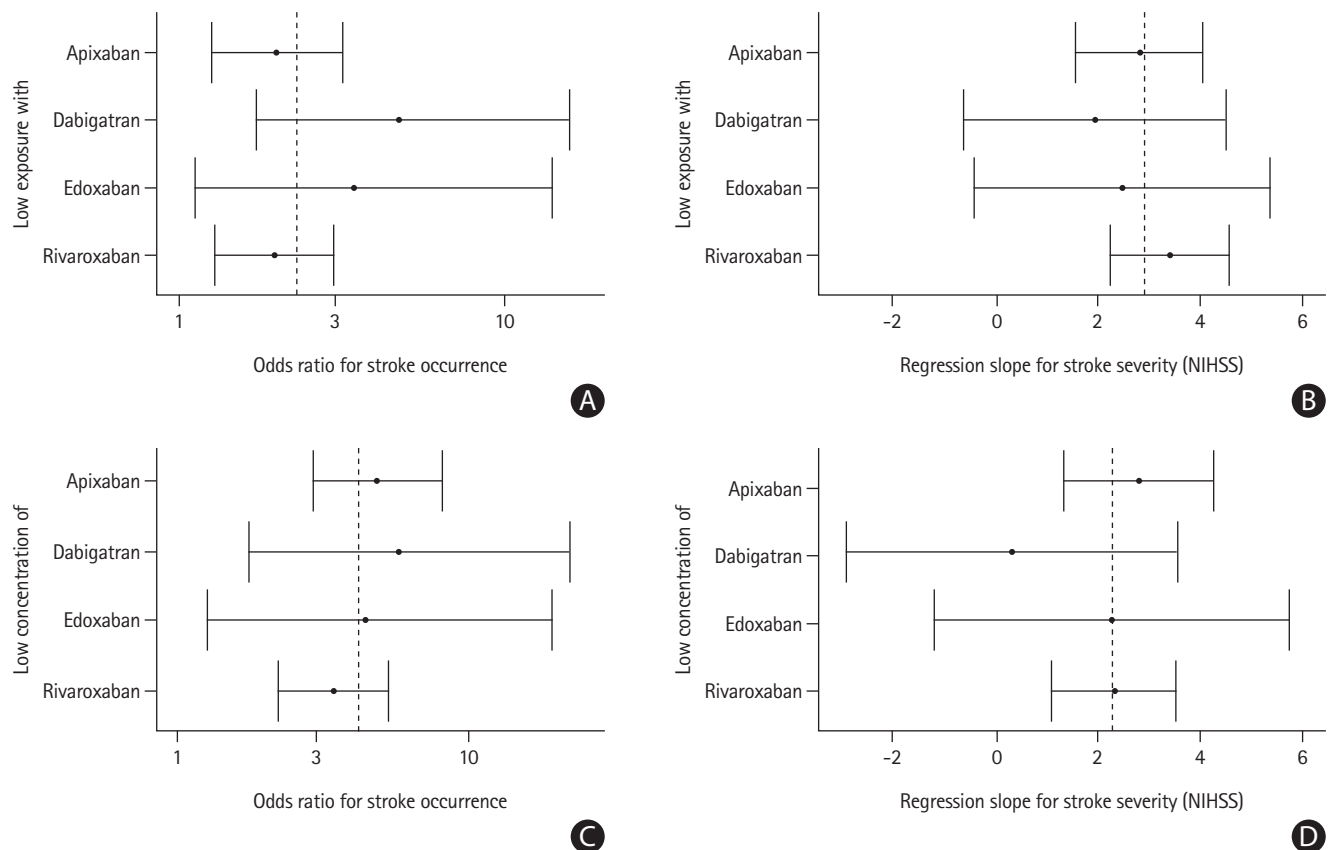

**Supplementary Figure 3.** Substance-specific modulation of overall direct oral anticoagulant (DOAC) effects expressed as odds ratio for the probability of stroke occurrence (left side, A, C) or as a linear increase in the National Institutes of Health Stroke Scale (NIHSS) score for stroke severity (right side, B, D). The top row indicates substance-specific effects around the DOAC class effect (dashed vertical line) in terms of exposure (area under the curve [AUC]), while the bottom row indicated substance-specific effects in term of concentration at the time of the event. Whiskers visualize 95% confidence intervals of the respective estimates.
